# Supplementary material
Source: PubMed Central journal article supplement (PMC3387423)
Supplement: supp_jc.2011-3073_11-3073_supp_figx2.pdf [file supp_jc.2011-3073_11-3073_supp_figx2.pdf]

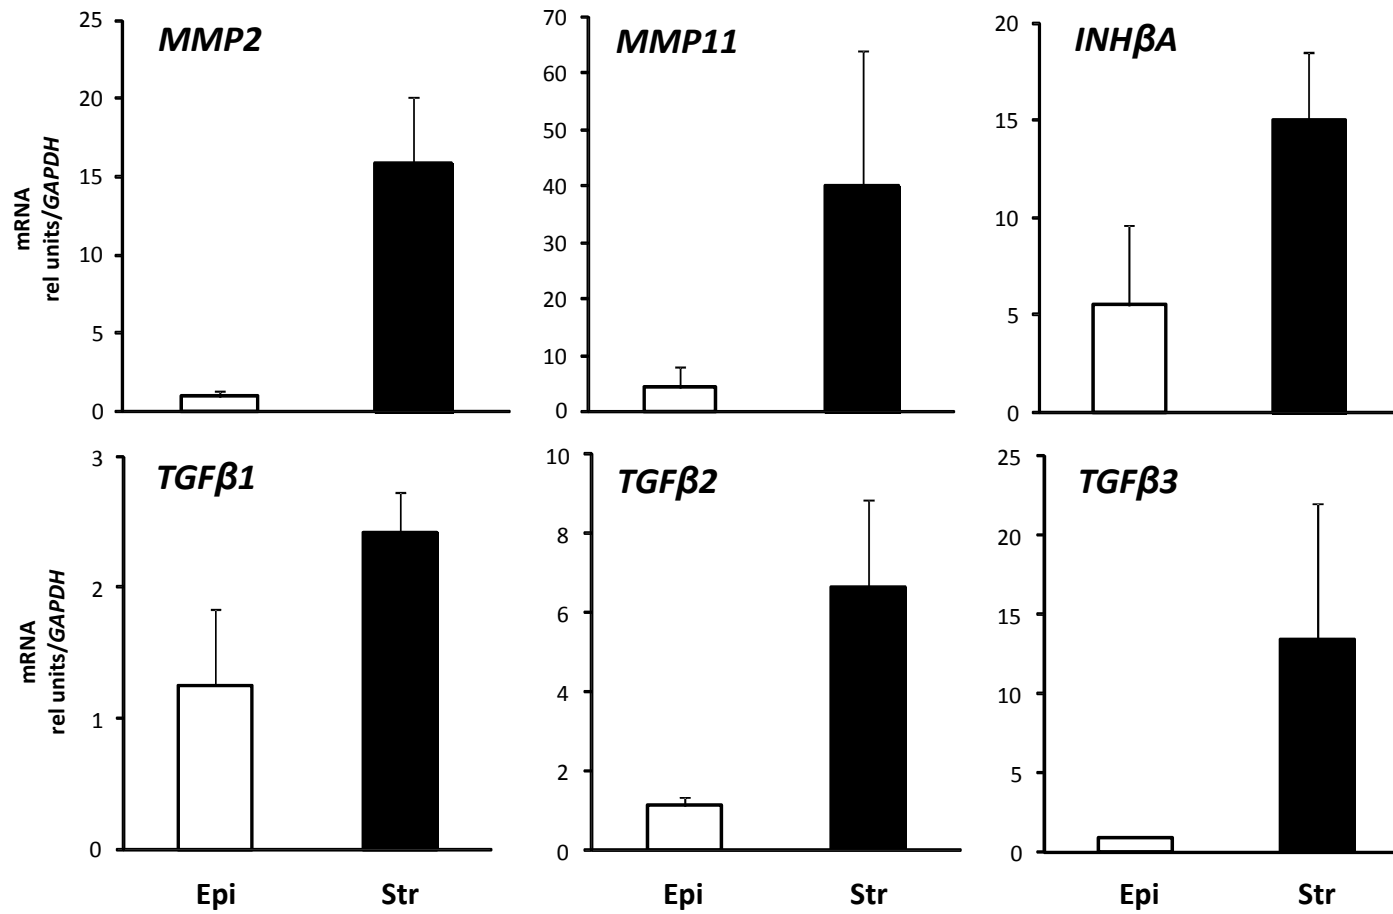

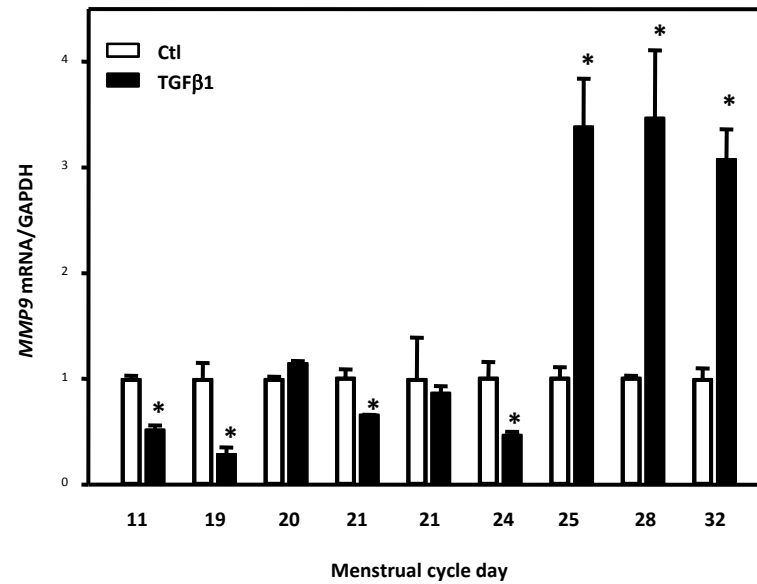

**sFig. 1. Effect of TGFβ1 on *MMP9* mRNA levels in human endometrial stromal cells.** Cells isolated from various stages of the menstrual cycle were treated with vehicle (Ctl, open bars) or TGFβ1 (5 ng/ml, solid bars) for 48 h. Thereafter, mRNA levels of *MMP9* were determined by qPCR. Data represent mean ± SEM of 3 samples in each group for each prep. \*P < 0.01 compared with control
